# Supplementary material for: Systemic Associations with Residual Subretinal Fluid after Ranibizumab in Diabetic Macular Edema
Source: Hindawi journal article supplement (doi:10.1155/2017/4834201), 2017-01-01
Supplement: f1 [file 4834201.f1.pdf]

## Supplementary tables

Table S1. Baseline Demographics In Eyes With Diabetic Macular Edema

| Parameter                    | Group 1 (n=68) | Group 2 (n=68) | All eyes (n=97) |
|------------------------------|----------------|----------------|-----------------|
| Age (years, mean±SD)         | 61.5±9.0       | 61.5±9.0       | 60.7±9.2        |
| Baseline CMT (µm, mean±SD)   | 413±99         | 422±109        | 419±102         |
| HTN (eyes, %)                | 56 (82.4)      | 56 (82.4)      | 79 (81.4)       |
| Insulin dependence (eyes, %) | 16 (23.5)      | 16 (23.5)      | 19 (19.6)       |
| CKD (eyes, %)                | 33 (48.5)      | 33 (48.5)      | 48 (49.5)       |
| HbA1c (% , mean±SD)          | 7.2±1.3        | 7.2±1.3        | 7.2±1.3         |
| DR severity (eyes, %)        |                |                |                 |
| NPDR                         | 14 (20.6)      | 15 (22.1)      | 21 (21.6)       |
| PDR                          | 54 (79.4)      | 53 (77.9)      | 76 (78.4)       |
| PRP status (eyes, %)         |                |                |                 |
| PRP naïve                    | 29 (42.6)      | 30 (44.1)      | 42 (43.3)       |
| PRP within 6 months          | 15 (22.1)      | 15 (22.1)      | 21 (21.6)       |
| PRP beyond 6 months          | 24 (35.3)      | 23 (33.8)      | 34 (35.1)       |

HTN: hypertension, CKD: Chronic kidney disease, CMT: central macular thickness, DR: diabetic retinopathy, designated as PDR or NPDR

Group 1: Right eye included if both eyes in a subject were enrolled

Group 2: Left eye included if both eyes in a subject were enrolled

Table S2. Correlating Factors For Central Macular Thickness After Ranibizumab

| Factor                                        | Beta Coefficient | Adjusted P value |
|-----------------------------------------------|------------------|------------------|
| Age                                           | 0.881            | 0.33             |
| Baseline CMT                                  | 0.163            | 0.02             |
| HbA1c                                         | -2.432           | 0.702            |
| Insulin Dependence<br>(Reference: insulin-)   | 25.108           | 0.16             |
| PRP status                                    |                  |                  |
| PRP beyond 6 months                           | 36.015           | 0.054            |
| PRP within 6 months<br>(Reference: PRP naïve) | 56.83            | 0.007            |
| eGFR*                                         | 21.852           | 0.039            |

eGFR\* denotes values categorized to stages as described in Table 2
